# Supplementary material
Source: PubMed Central journal article supplement (PMC521935)

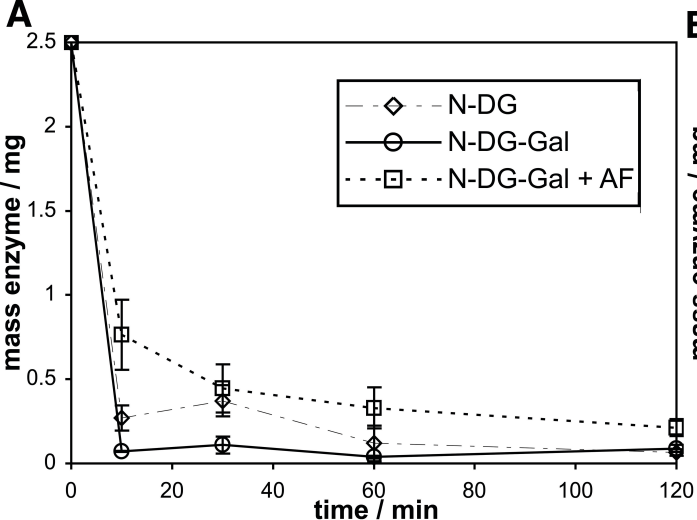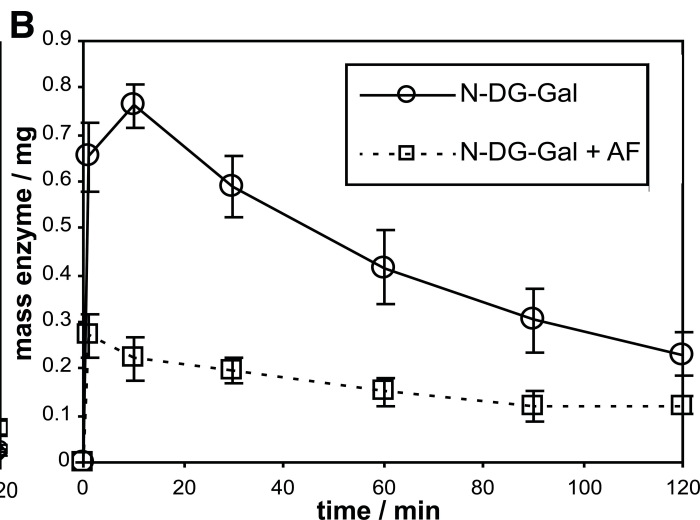

Supplement: pnas_101_40_14527__1.pdf [file pnas_101_40_14527__1.pdf]

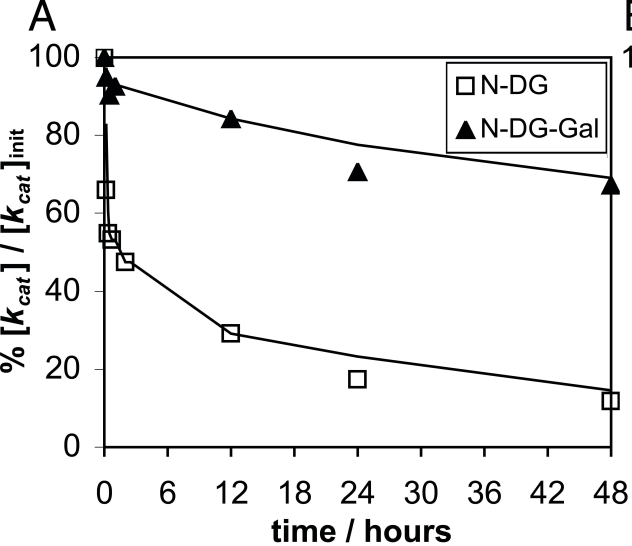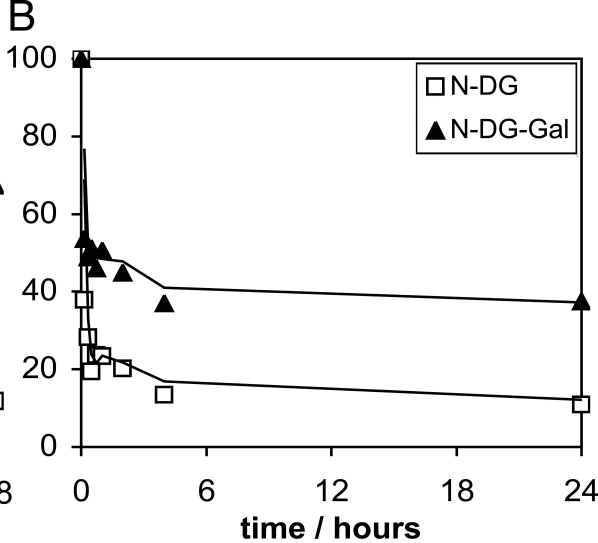

Supplement: pnas_101_40_14527__2.pdf [file pnas_101_40_14527__2.pdf]

# MALDI MS

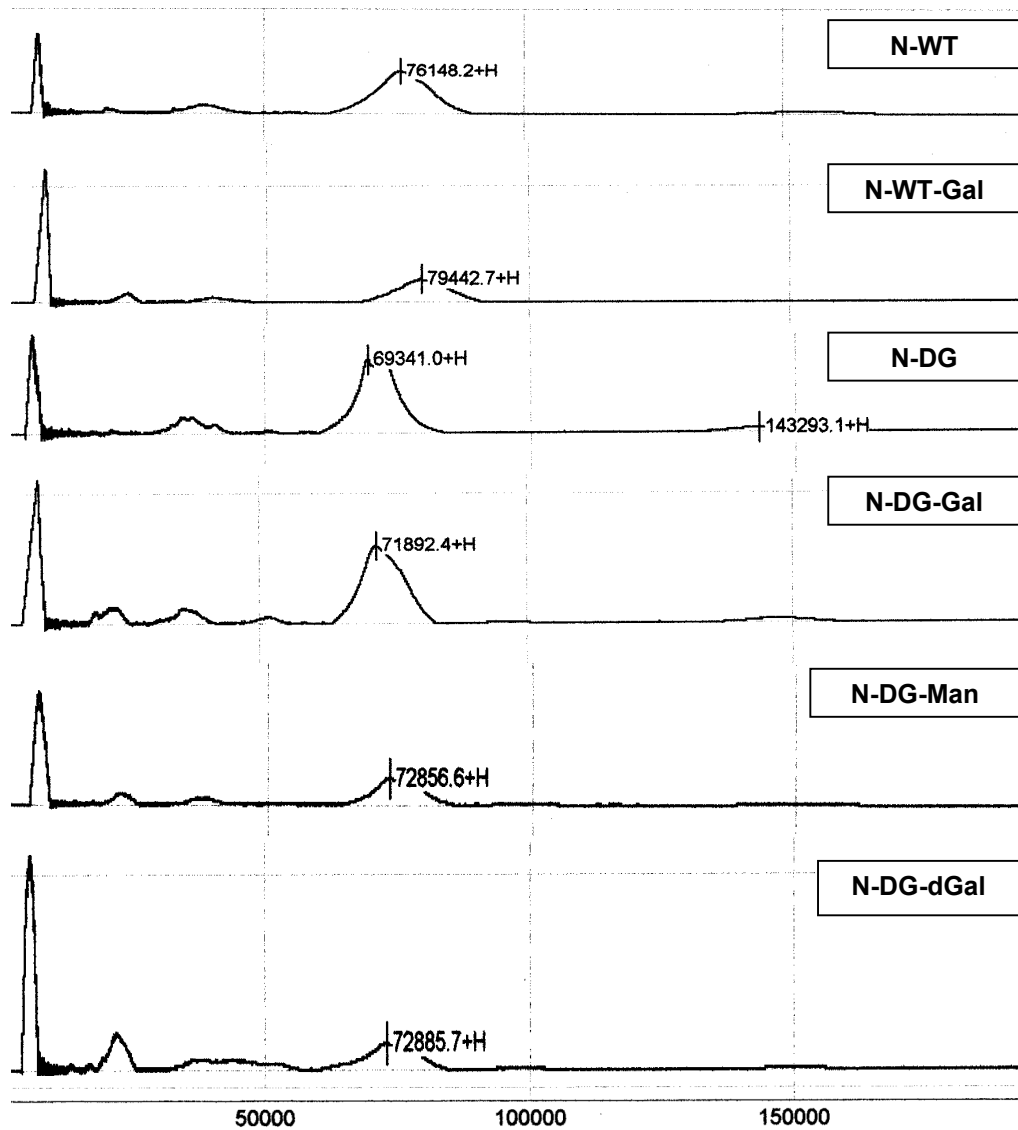

Supplement: pnas_101_40_14527__3.pdf [file pnas_101_40_14527__3.pdf]

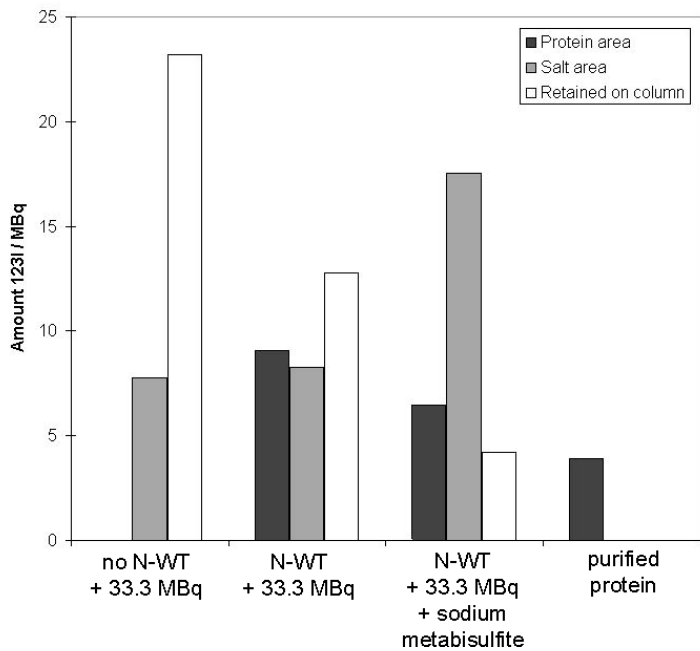

Supplement: pnas_101_40_14527__4.pdf [file pnas_101_40_14527__4.pdf]

| Enzyme      | Time course (0 – top left, 10, 30, 60, 90, 120min – bottom right)                  |                                                                                                                               |                                                                                                                                  |
|-------------|------------------------------------------------------------------------------------|-------------------------------------------------------------------------------------------------------------------------------|----------------------------------------------------------------------------------------------------------------------------------|
| <b>N-DG</b> |   |                                             |                                               |
|             |   |                                             |                                               |
| <b>N-WT</b> |  |  <p data-bbox="758 1017 790 1032">t=10</p> |  <p data-bbox="1077 1017 1109 1032">t=30</p> |

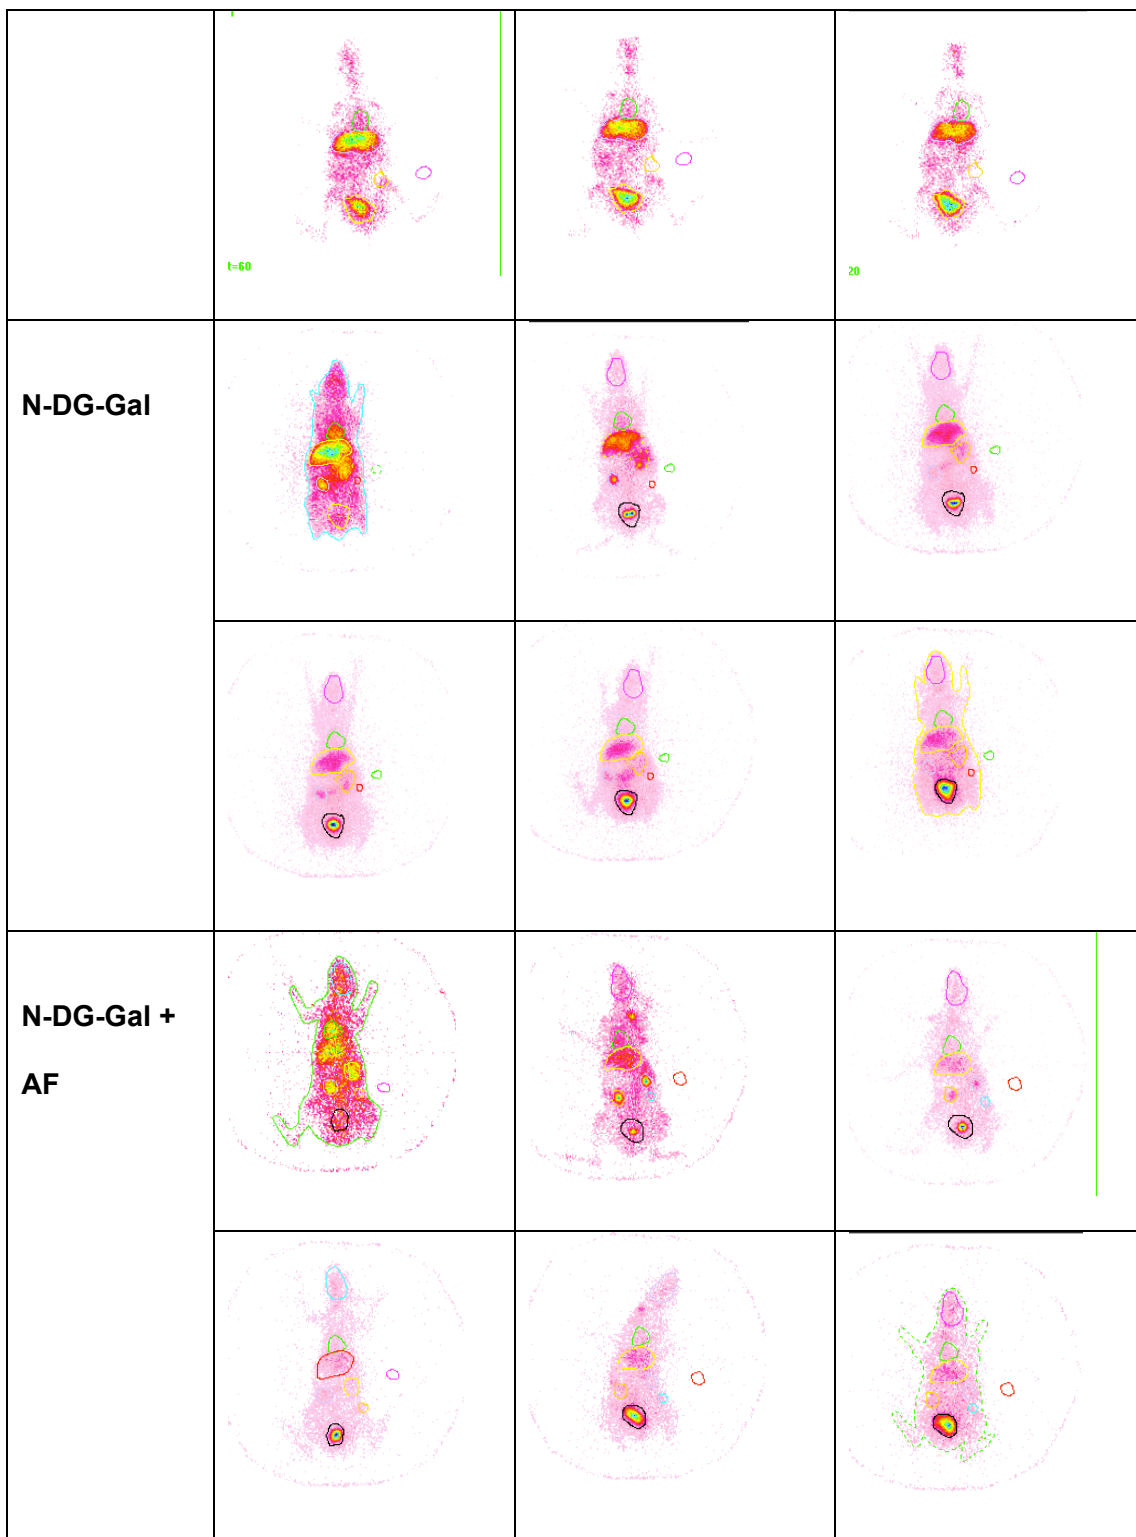

Supplement: pnas_101_40_14527__5.pdf [file pnas_101_40_14527__5.pdf]

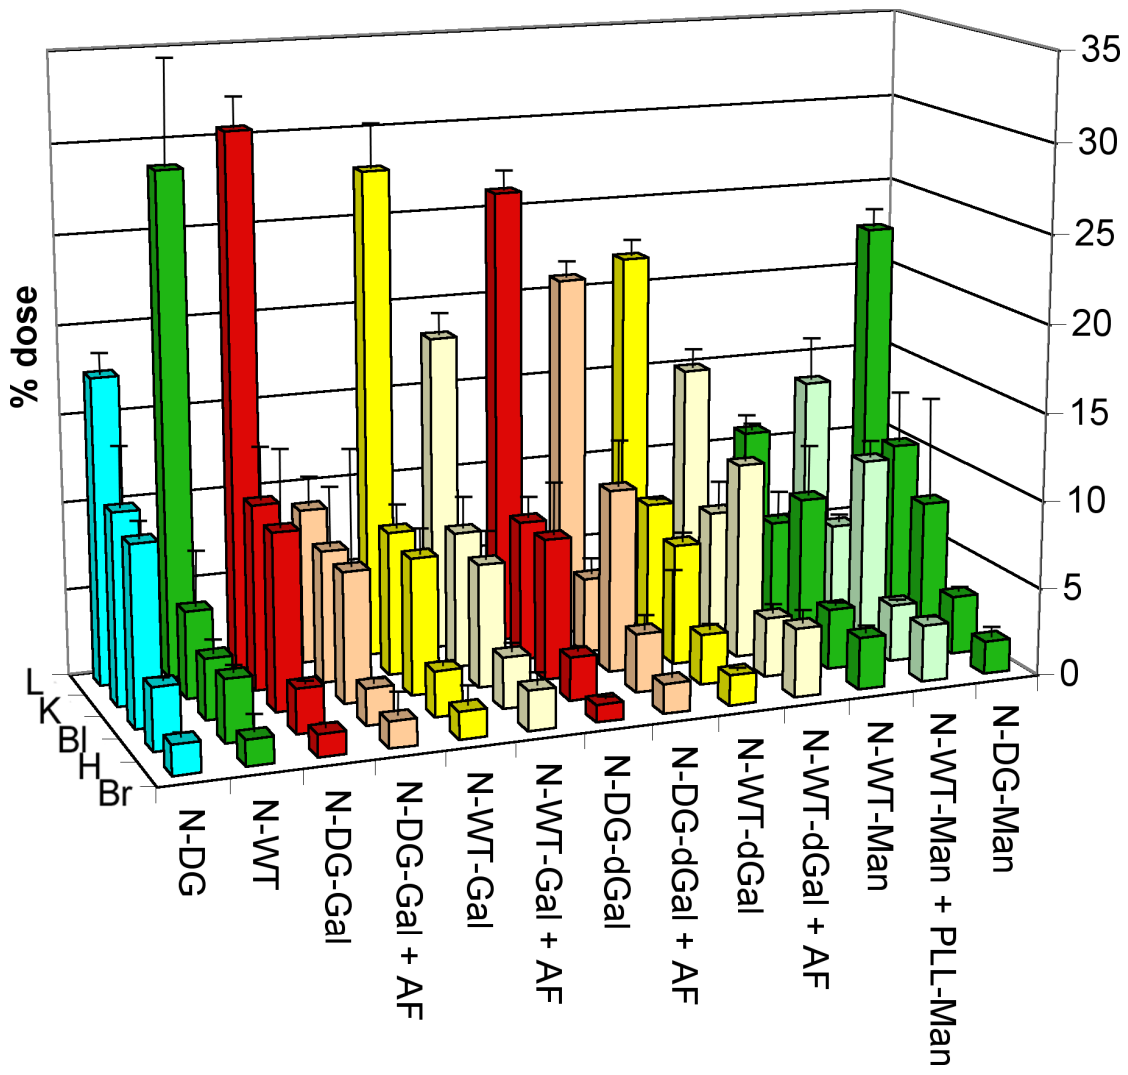

Supplement: pnas_101_40_14527__6.pdf [file pnas_101_40_14527__6.pdf]

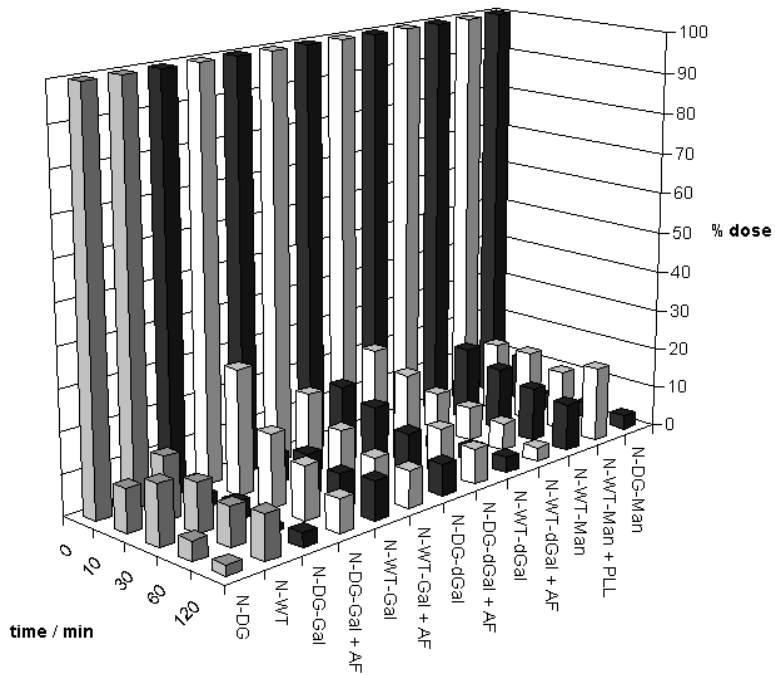

Supplement: pnas_101_40_14527__7.pdf [file pnas_101_40_14527__7.pdf]
